# Supplementary material for: Long Noncoding RNA LINC01134 Promotes Hepatocellular Carcinoma Metastasis via Activating AKT1S1 and NF-κB Signaling
Source: PubMed Central journal article supplement (PMC7325970; doi:10.3389/fcell.2020.00429), 2020-06-12
Supplement: Image_1.pdf [file Image_1.pdf]

## Supplementary Material

### 1 Supplementary Figures 1–4

#### 1.1 Supplementary Figure 1

**A**

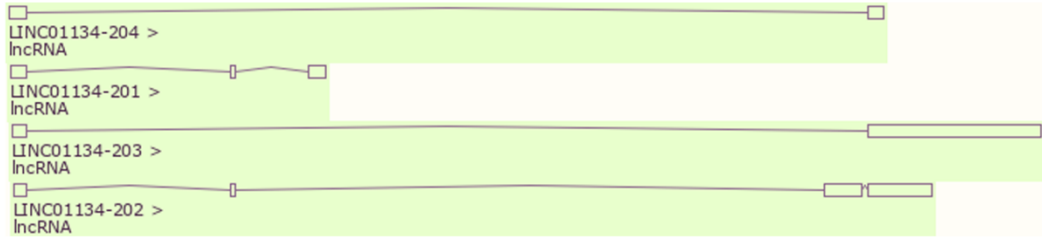

**B**

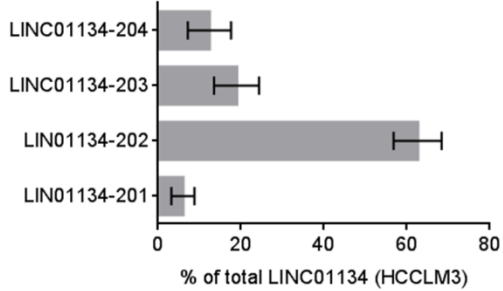

**C**

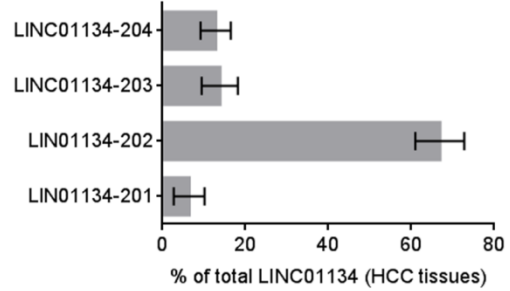

**D**

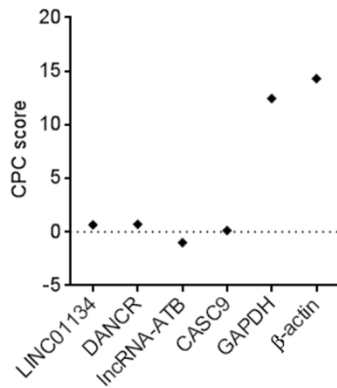

**E**

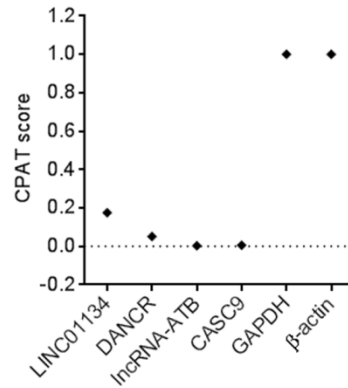

**F**

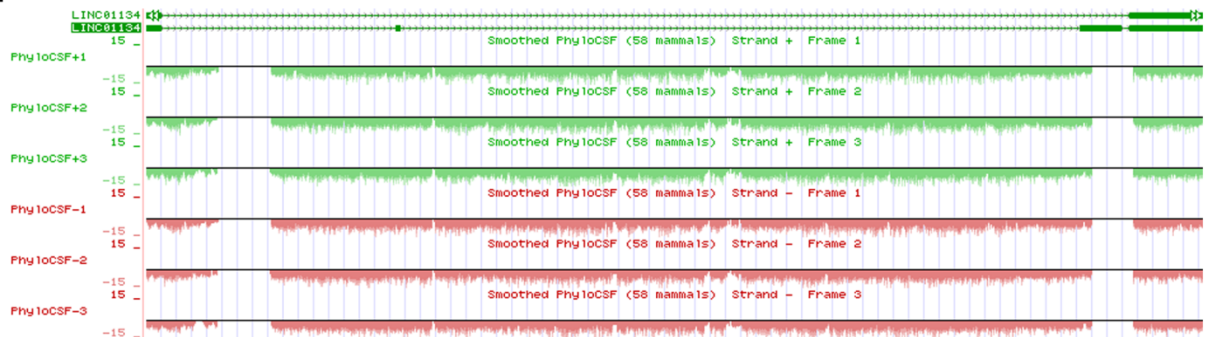

**Supplementary Figure 1.** The characteristics of LINC01134. **(A)** The exon maps for the four isoforms. **(B)** The expression levels of LINC01134 isoforms in HCCLM3 cells were detected by qRT-PCR with isoform-specific primers. Results are shown as the mean  $\pm$  SD of three independent experiments. **(C)** The expression levels of LINC01134 isoforms in HCC tissues were detected by qRT-PCR with isoform-specific primers. Results are shown as the mean  $\pm$  SD of three independent experiments. **(D)** Protein coding capacity of LINC01134 and control transcripts was determined by CPC *in silico* tools. **(E)** Protein coding capacity of LINC01134 and control transcripts was determined by CPAT *in silico* tools. **(F)** UCSC genome browser view of PhyloCSF tracks for LINC01134.

## 1.2 Supplementary Figure 2

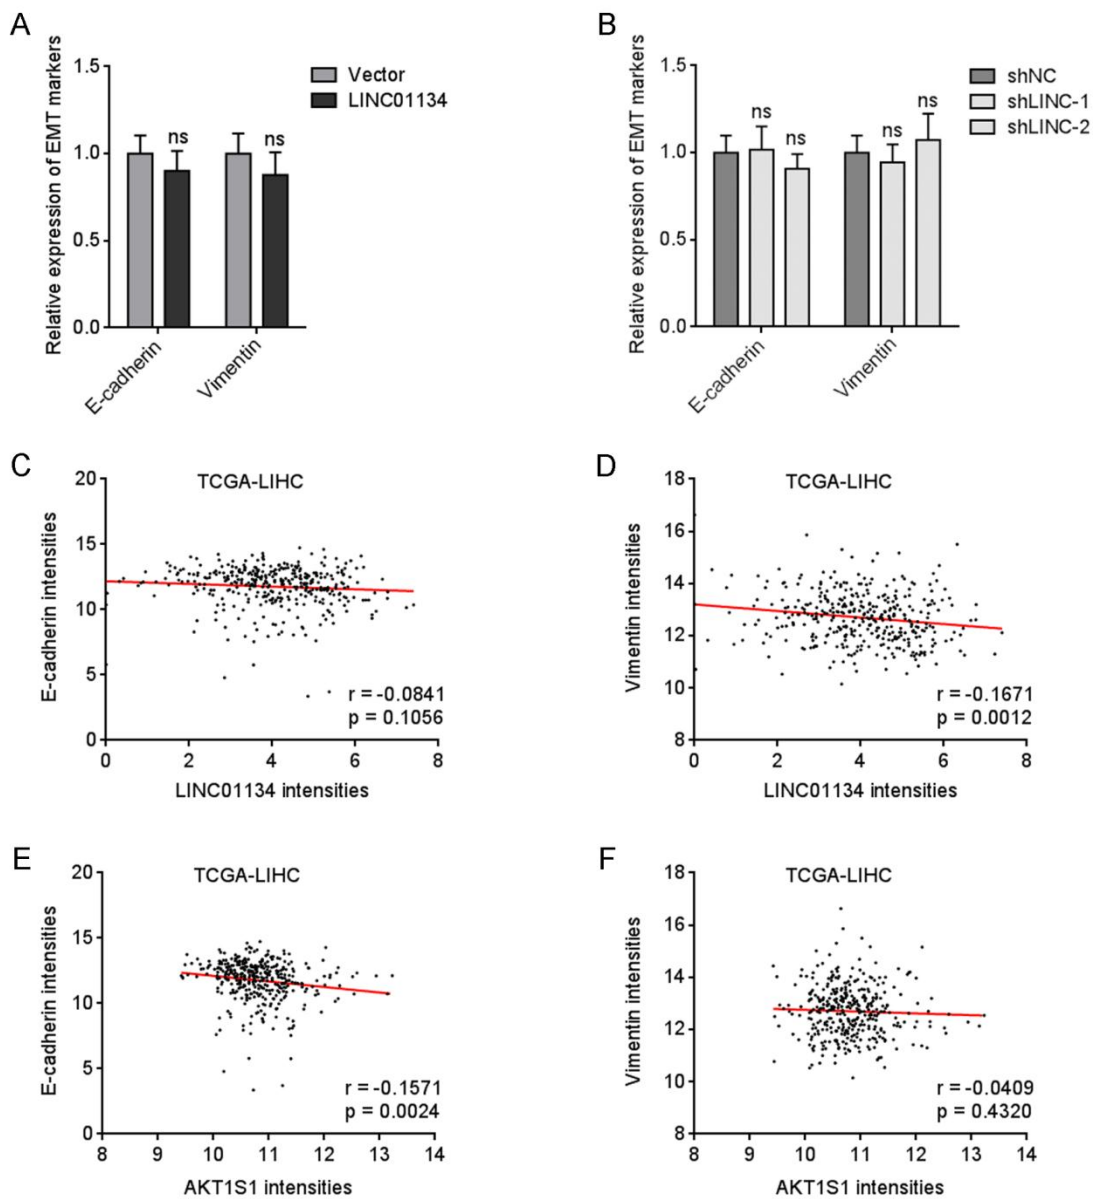

**Supplementary Figure 2.** LINC01134 and AKT1S1 do not modulate EMT. **(A)** The expression of E-cadherin and Vimentin in LINC01134 stably overexpressed and control SK-HEP-1 cells was detected by qRT-PCR. ns, not significant, by unpaired two-sided Student's *t*-test. **(B)** The expression of E-cadherin and Vimentin in LINC01134 stably silenced and control HCCLM3 cells was detected by qRT-PCR. ns, not significant, by one-way ANOVA followed by Dunnett's multiple comparisons test. **(C)** The correlation between LINC01134 and E-cadherin expression intensities from TCGA LIHC dataset.  $r = -0.0841$ ,  $p = 0.1056$  by Spearman correlation analysis. **(D)** The correlation between LINC01134 and Vimentin expression intensities from TCGA LIHC dataset.  $r = -0.1671$ ,  $p = 0.0012$  by Spearman correlation analysis. **(E)** The correlation between AKT1S1 and E-cadherin expression intensities from TCGA LIHC dataset.  $r = -0.1571$ ,  $p = 0.0024$  by Spearman correlation analysis. **(F)** The correlation between AKT1S1 and Vimentin expression intensities from TCGA LIHC dataset.  $r = -0.0409$ ,  $p = 0.4320$  by Spearman correlation analysis.

## 1.3 Supplementary Figure 3

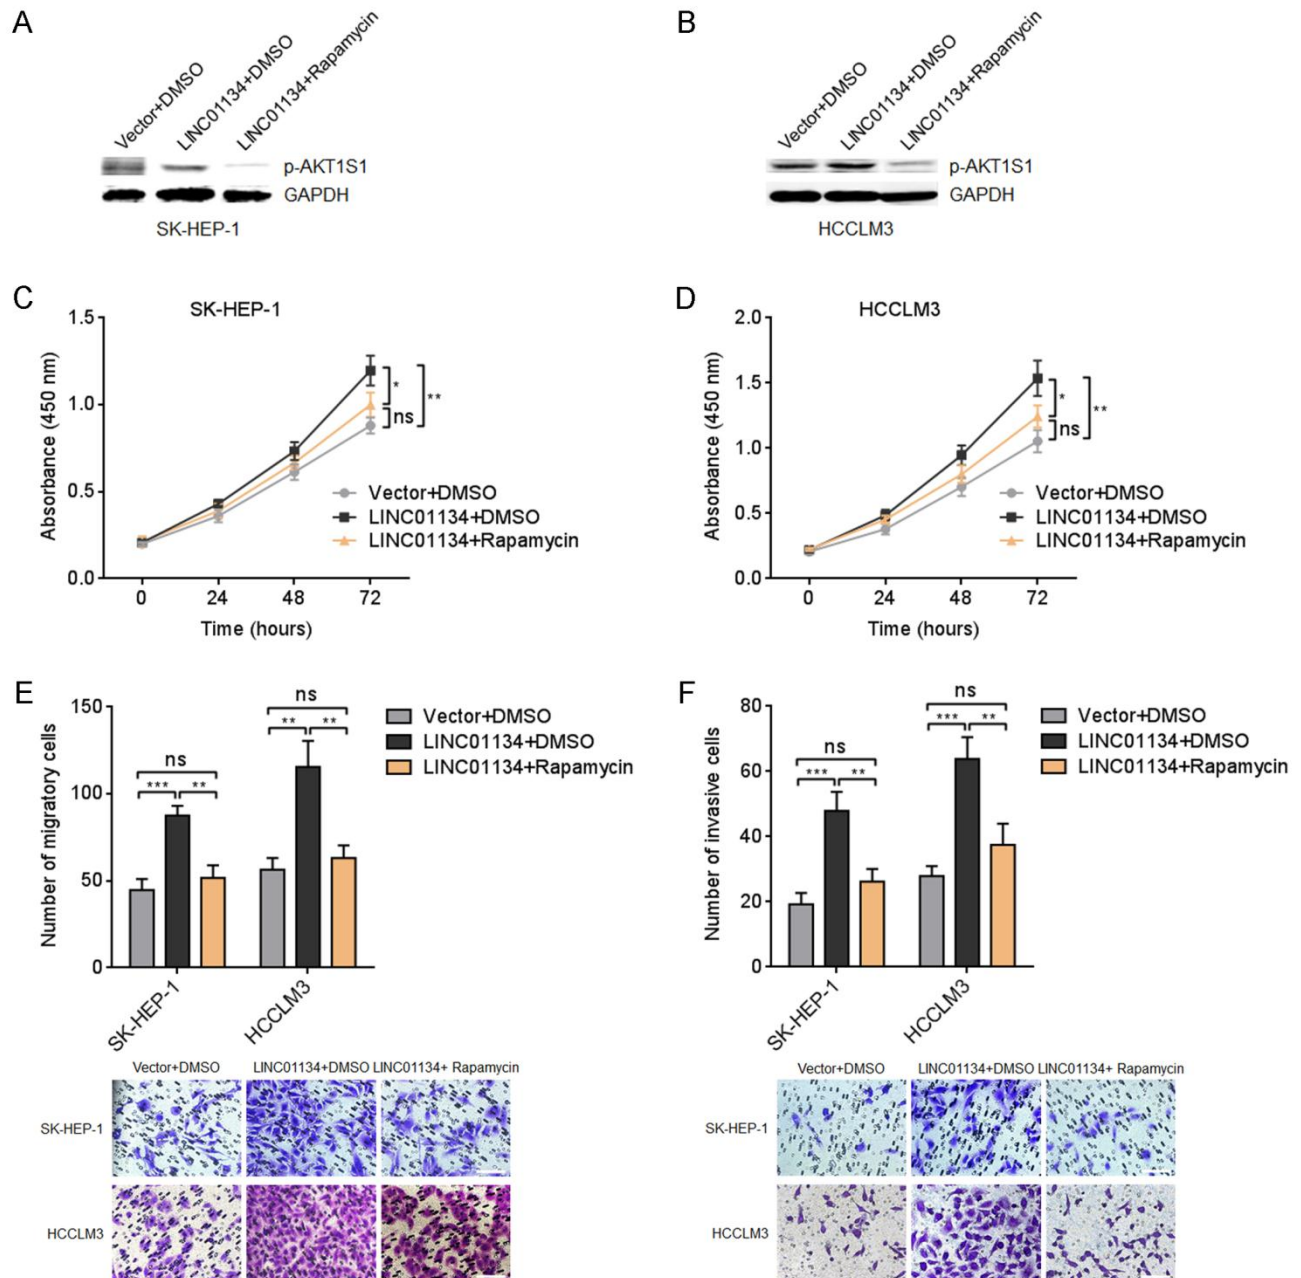

**Supplementary Figure 3.** Inhibition of AKT1S1 by rapamycin reverses the roles of LINC01134 in HCC. **(A)** AKT1S1 phosphorylation levels in LINC01134 stably overexpressed and control SK-HEP-1 cells pretreated with 20 nM rapamycin for 48 hours were detected by western blot. **(B)** AKT1S1 phosphorylation levels in LINC01134 stably overexpressed and control HCCLM3 cells pretreated with 20 nM rapamycin for 48 hours were detected by western blot. **(C)** LINC01134 stably overexpressed and control SK-HEP-1 cells were treated with 20 nM rapamycin. Concurrently, cell proliferation was assessed by CCK-8 assays. **(D)** LINC01134 stably overexpressed and control

HCCLM3 cells were treated with 20 nM rapamycin. Concurrently, cell proliferation was assessed by CCK-8 assays. **(E)** LINC01134 stably overexpressed and control SK-HEP-1 and HCCLM3 cells were treated with 20 nM rapamycin. Concurrently, migration ability of treated cells was assessed by transwell migration assays. Representative images of migratory cells were shown. Scale bar = 100  $\mu$ m. **(F)** LINC01134 stably overexpressed and control SK-HEP-1 and HCCLM3 cells were treated with 20 nM rapamycin. Concurrently, invasion ability of treated cells was assessed by transwell invasion assays. Representative images of invasive cells were shown. Scale bar = 100  $\mu$ m. Results are shown as the mean  $\pm$ SD of three independent experiments. \*  $p < 0.05$ , \*\*  $p < 0.01$ , \*\*\*  $p < 0.001$ , ns, not significant, by one-way ANOVA followed by Tukey's multiple comparisons test.

#### 1.4 Supplementary Figure 4

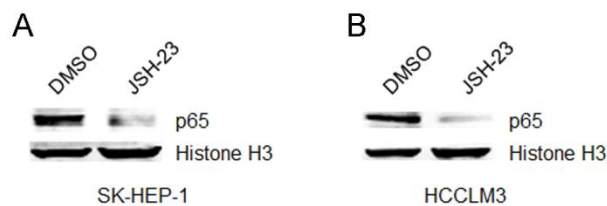

**Supplementary Figure 4.** JSH-23 represses p65 nuclear translocation. **(A)** Nuclear p65 levels in LINC01134 overexpressed SK-HEP-1 cells pretreated with 5  $\mu$ M JSH-23 or DMSO for 48 hours was detected by western blot. **(B)** Nuclear p65 levels in LINC01134 overexpressed HCCLM3 cells pretreated with 5  $\mu$ M JSH-23 or DMSO for 48 hours was detected by western blot.
